# Supplementary material for: GDF11 induces differentiation and apoptosis and inhibits migration of C17.2 neural stem cells via modulating MAPK signaling pathway
Source: PeerJ journal article supplement (doi:10.7717/peerj.5524), 2018-09-04
Supplement: raw_data_for_WB.pdf [file raw_data_for_WB.pdf]

1. The uncropped blots of Fig.2b

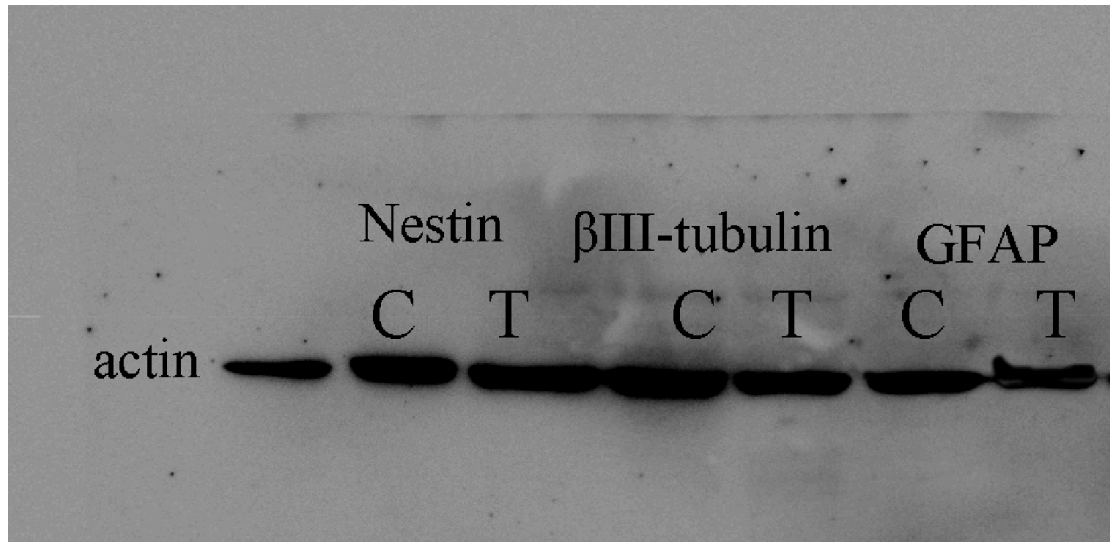

$\beta$ -actin for Fig.2b

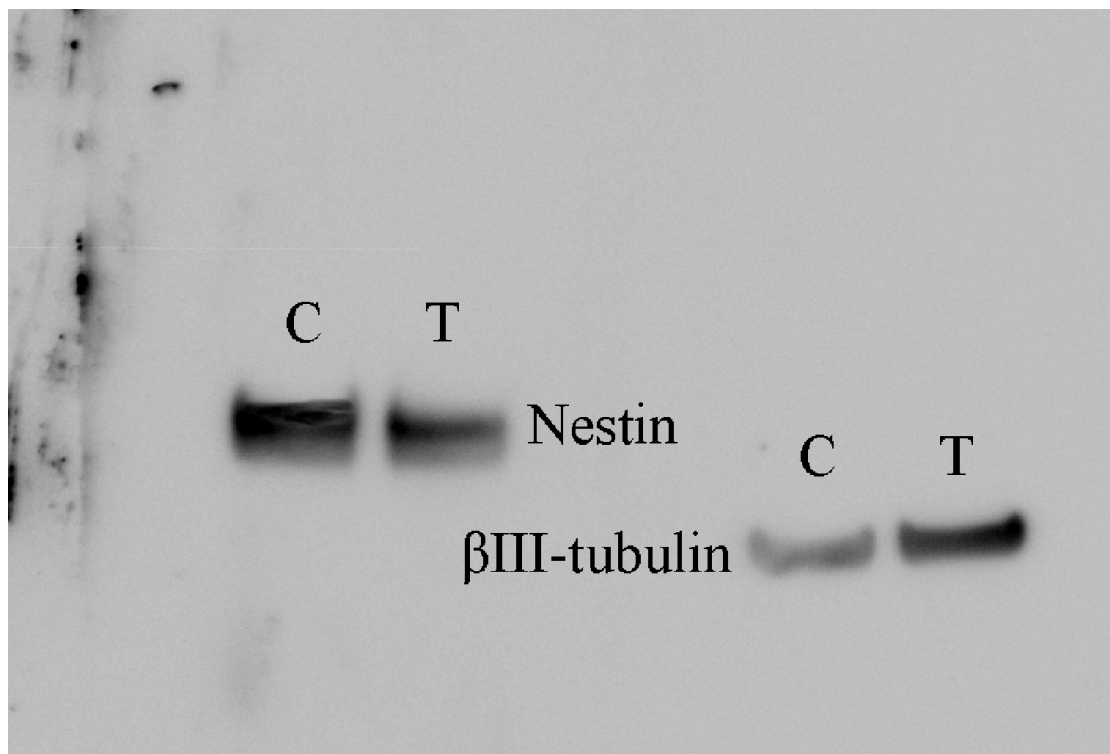

Nestin and  $\beta$  III-tubulin for Fig.2b

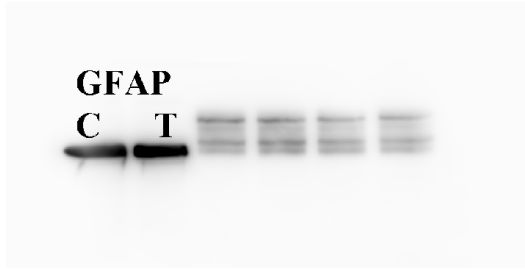

GFAP for Fig.2b

2. The uncropped blots of Fig.4

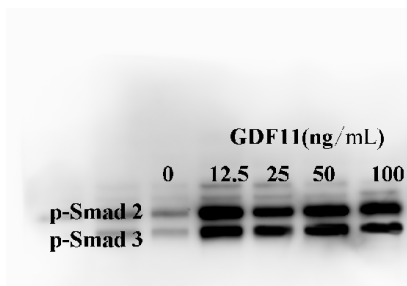

p-Smad2/3 for Fig.4a

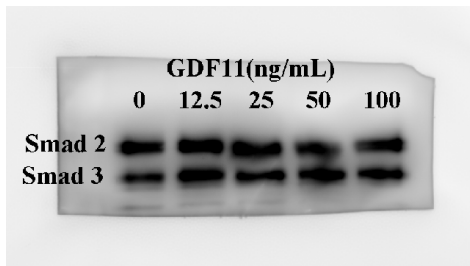

Smad2/3 for Fig.4a

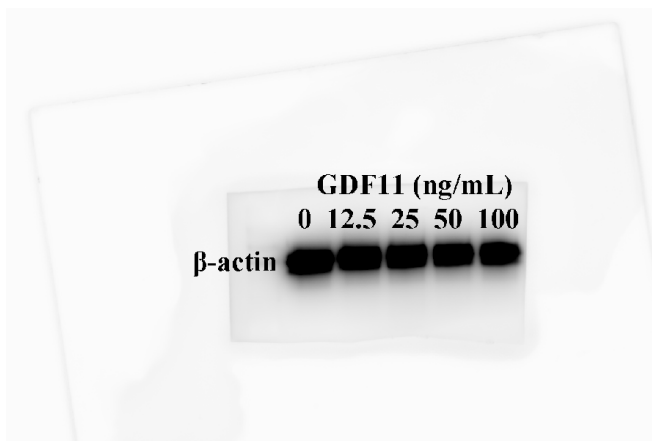

$\beta$ -actin for Fig.4a

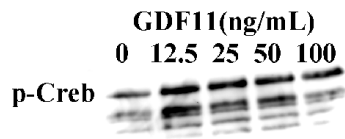

p-creb for Fig.4b

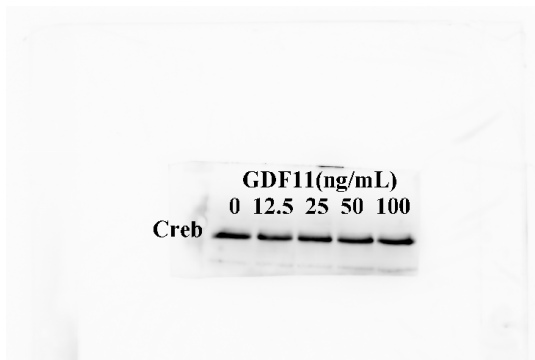

Creb for Fig.4b

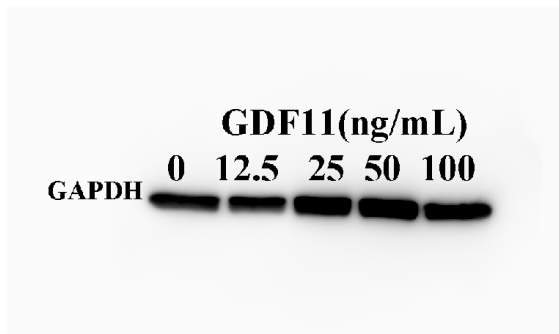

GAPDH for Fig.4b

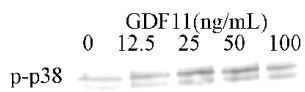

p-p38 for Fig.4c

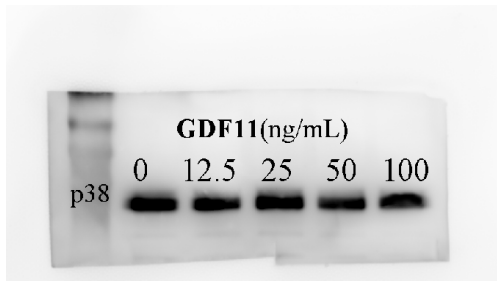

p38 for Fig.4c

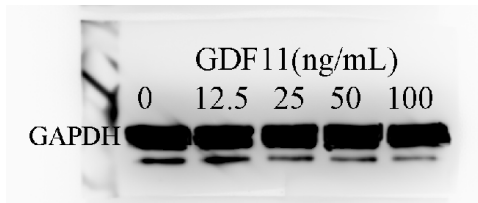

GAPDH for Fig.4c

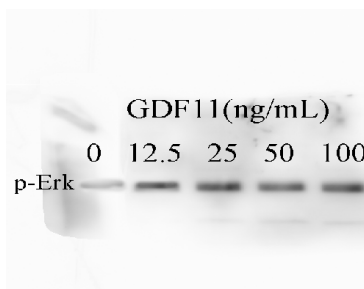

p-Erk1/2 for Fig.4d

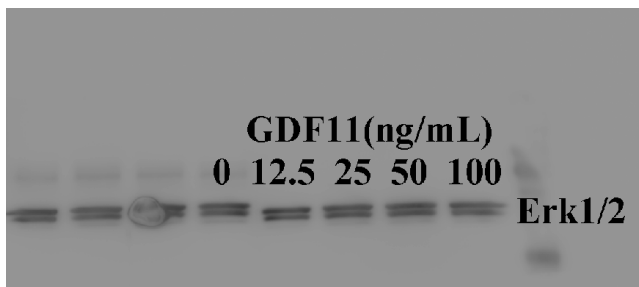

Erk1/2 for Fig.4d

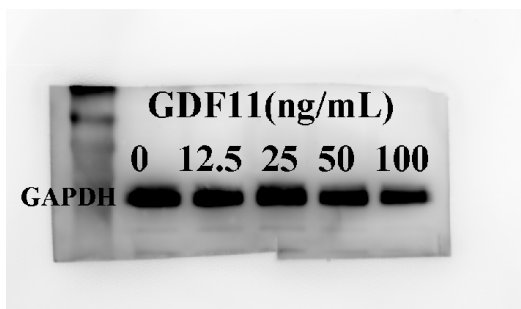

GAPDH for Fig.4d
